# Supplementary material for: CTCF and CohesinSA-1 Mark Active Promoters and Boundaries of Repressive Chromatin Domains in Primary Human Erythroid Cells
Source: PubMed Central journal article supplement (PMC4878738; doi:10.1371/journal.pone.0155378), 2016-05-24

**SUPPLEMENTAL FIGURE A.** *Analytic flow activated cell sorting analyses of cultured human primary erythroid cells.* Erythroid progenitor cells were cultured and isolated as described. Immunomagnetic bead selection was used to select a population of cells based on expression of CD71 (transferrin receptor) and CD235a (glycophorin A), representing the R3/R4 cell population of nucleated erythroid cells at >95% purity as assessed by analytic FACS.

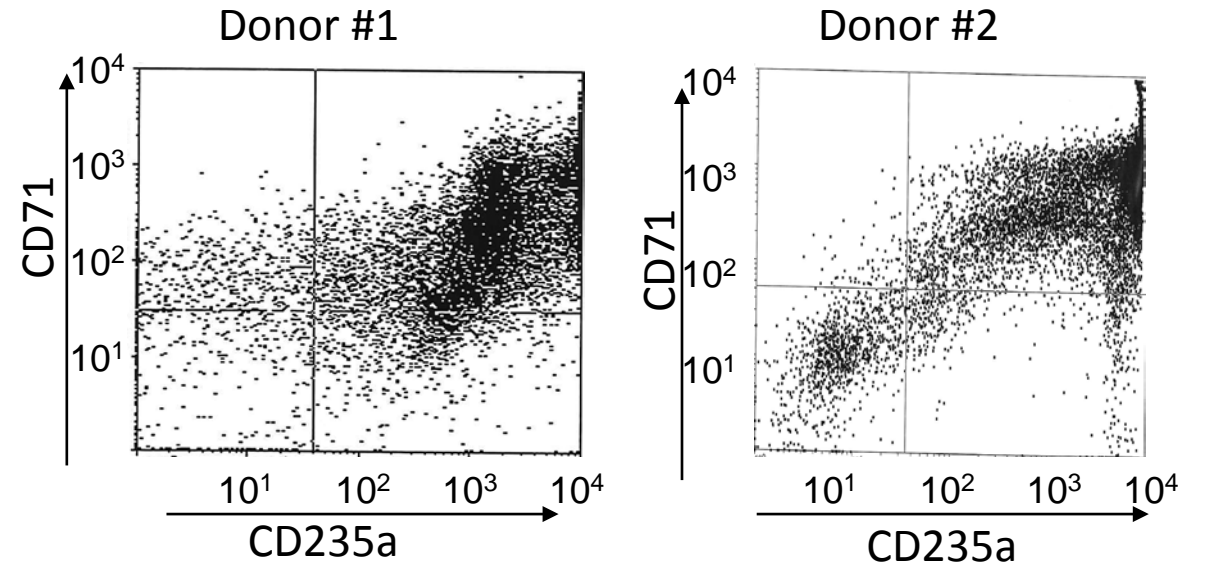

**SUPPLEMENTAL FIGURE B.** *Correlation heat map using affinity (read count) data.* Read counts of peak regions were obtained for all samples using the Diffbind package. Correlation values for all regions are displayed as a heat map where the amount of correlation is as displayed in the key. Patterns of similarity are revealed by hierarchical clustering.

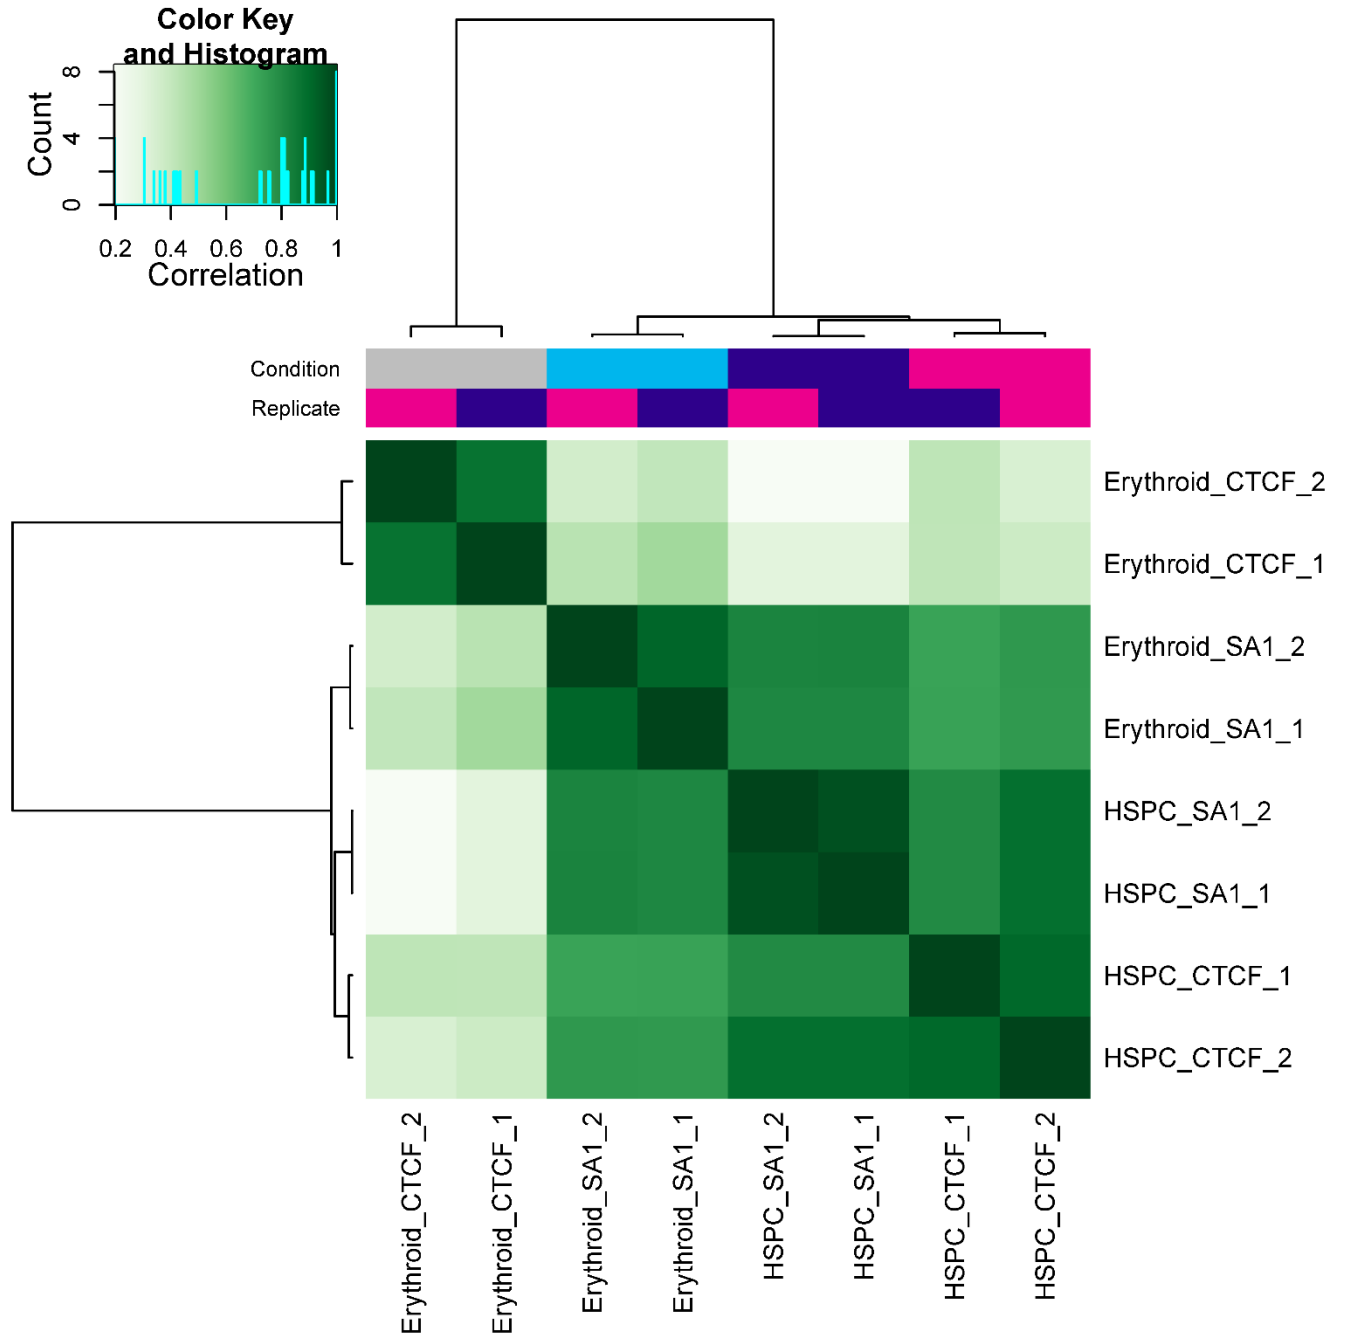

**SUPPLEMENTAL FIGURE C.** *Principal components analysis of affinity (read count) data.* Read counts of peak regions were obtained for all samples using the Diffbind package. The data is subjected to Principal Components analysis to reveal the patterns of sample relatedness.

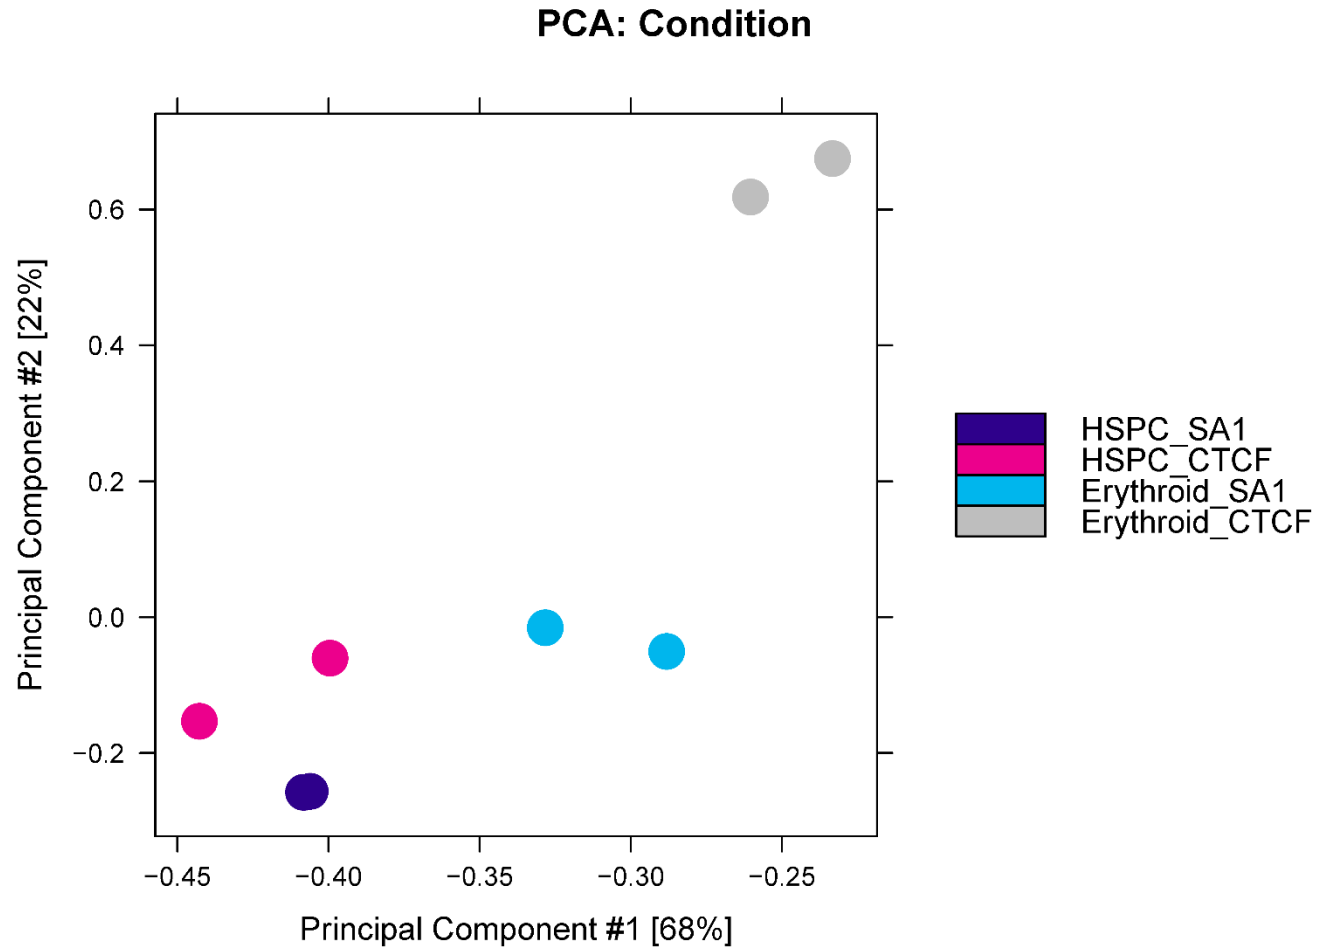

**SUPPLEMENTAL FIGURE D.** *Heat map of affinity (read count) data for individual sites in individual ChIP-seq samples.* Read counts of peak regions were obtained for all samples using the Diffbind package. Normalized binding values for all regions are displayed as a heat map where the amount of binding is as displayed in the key. Patterns of similarity are revealed by hierarchical clustering.

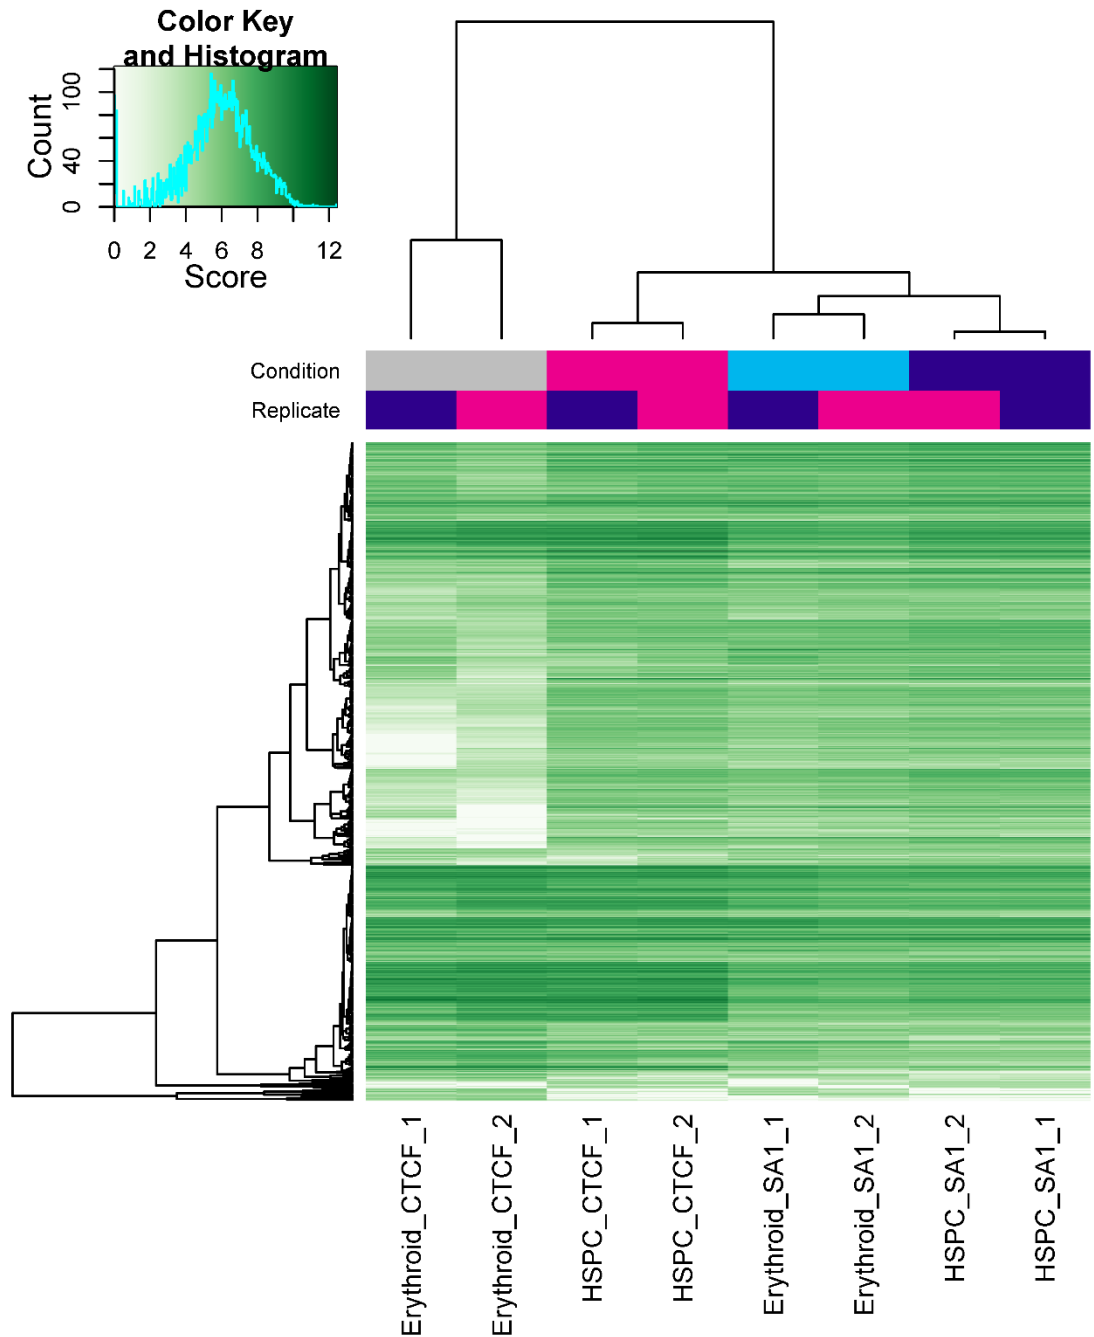

**SUPPLEMENTAL FIGURE E.** Sites of CTCF and cohesin<sup>SA-1</sup> occupancy in HSPCs and erythroid cells. Four-way Venn diagram representation of overlapping and unique sites of CTCF and cohesin<sup>SA-1</sup> occupancy in HSPC and erythroid cells.

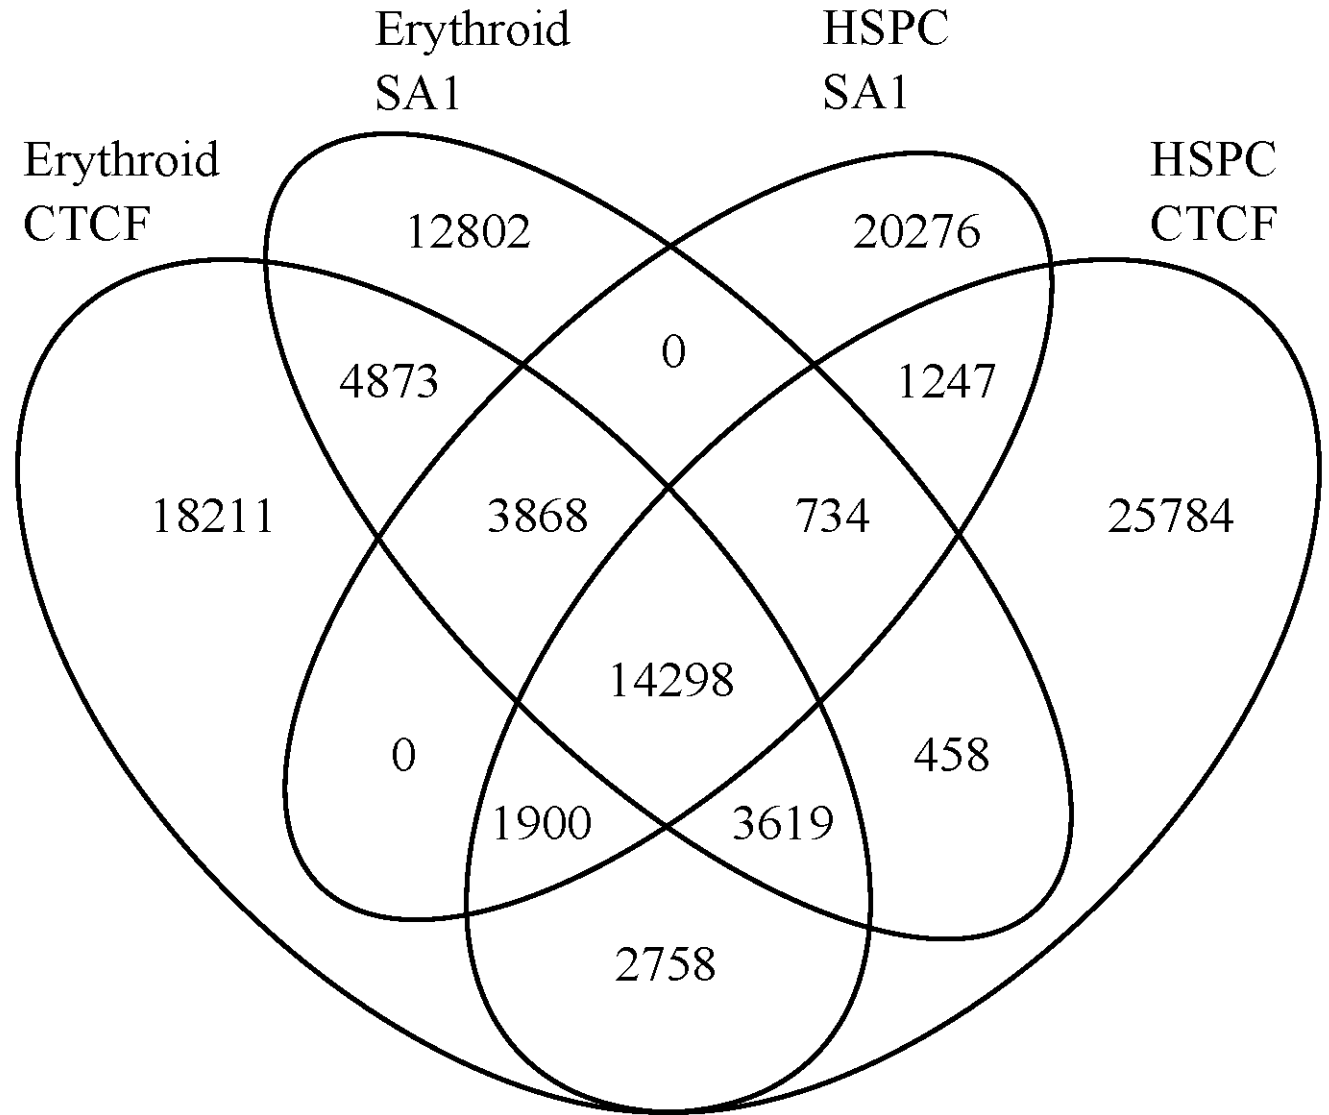

**SUPPLEMENTAL FIGURE F. Motif analysis**  
*using the Homer algorithm.* The top regulatory protein binding sites identified by the Homer algorithm searching  $\pm 50$ bp from summits of at sites of CTCF and cohesin<sup>SA-1</sup> binding. Hematopoietic stem and progenitor cells. The top four motifs ranked by *p*-value are shown.

| HSPC<br>CTCF only                      |                                                                                       | P-value | Best Match |
|----------------------------------------|---------------------------------------------------------------------------------------|---------|------------|
|                                        |    | 1e-1444 | CTCF       |
|                                        |    | 1e-87   | ETS/E box  |
|                                        |    | 1e-52   | Smad3      |
|                                        |    | 1e-44   | CEBPA      |
| HSPC<br>Cohesin <sup>SA-1</sup> only   |                                                                                       | P-value | Best Match |
|                                        |    | 1e-29   | BRCA1      |
|                                        |    | 1e-23   | Nrf2       |
|                                        |    | 1e-22   | ZFX        |
|                                        |    | 1e-20   | AR         |
| HSPC<br>CTCF + Cohesin <sup>SA-1</sup> |                                                                                       | P-value | Best Match |
|                                        |  | 1e-6519 | CTCFL      |
|                                        |  | 1e-536  | CTCF       |
|                                        |  | 1e-137  | CEBPA      |
|                                        |  | 1e-115  | DCE        |

**SUPPLEMENTAL FIGURE G.** *Motif analysis using the Homer algorithm.* The top regulatory protein binding sites identified by the Homer algorithm searching  $\pm 50$ bp from summits of at sites of CTCF and cohesin<sup>SA-1</sup> binding. Erythroid cells. The top four motifs ranked by *p*-value are shown.

| Erythroid CTCF only                                                                   | P-value | Best Match |
|---------------------------------------------------------------------------------------|---------|------------|
|    | 1e-5441 | CTCF       |
|    | 1e-250  | E2F2       |
|    | 1e-149  | MZF1       |
|    | 1e-138  | Sp4        |
| Erythroid Cohesin <sup>SA-1</sup> only                                                | P-value | Best Match |
|    | 1e-22   | Sp1        |
|    | 1e-17   | Nanog      |
|    | 1e-15   | PAX5       |
|    | 1e-13   | Smad3      |
| Erythroid CTCF + Cohesin <sup>SA-1</sup>                                              | P-value | Best Match |
|  | 1e-8528 | CTCF       |
|  | 1e-1025 | Sp4        |
|  | 1e-513  | NF1C       |
|  | 1e-318  | Atoh1      |

**SUPPLEMENTAL FIGURE H.** *Correlation of repressive domains and gene expression in HSPCs and erythroid cells.* Gene expression levels (log<sub>2</sub> RPKM) in primary human HSPC and erythroid cell mRNA for genes with or without repressive chromatin domains marked H3K27me<sub>3</sub> at their promoters are displayed. There was a strong anti-correlation of gene expression with H3K27me<sub>3</sub> domains.

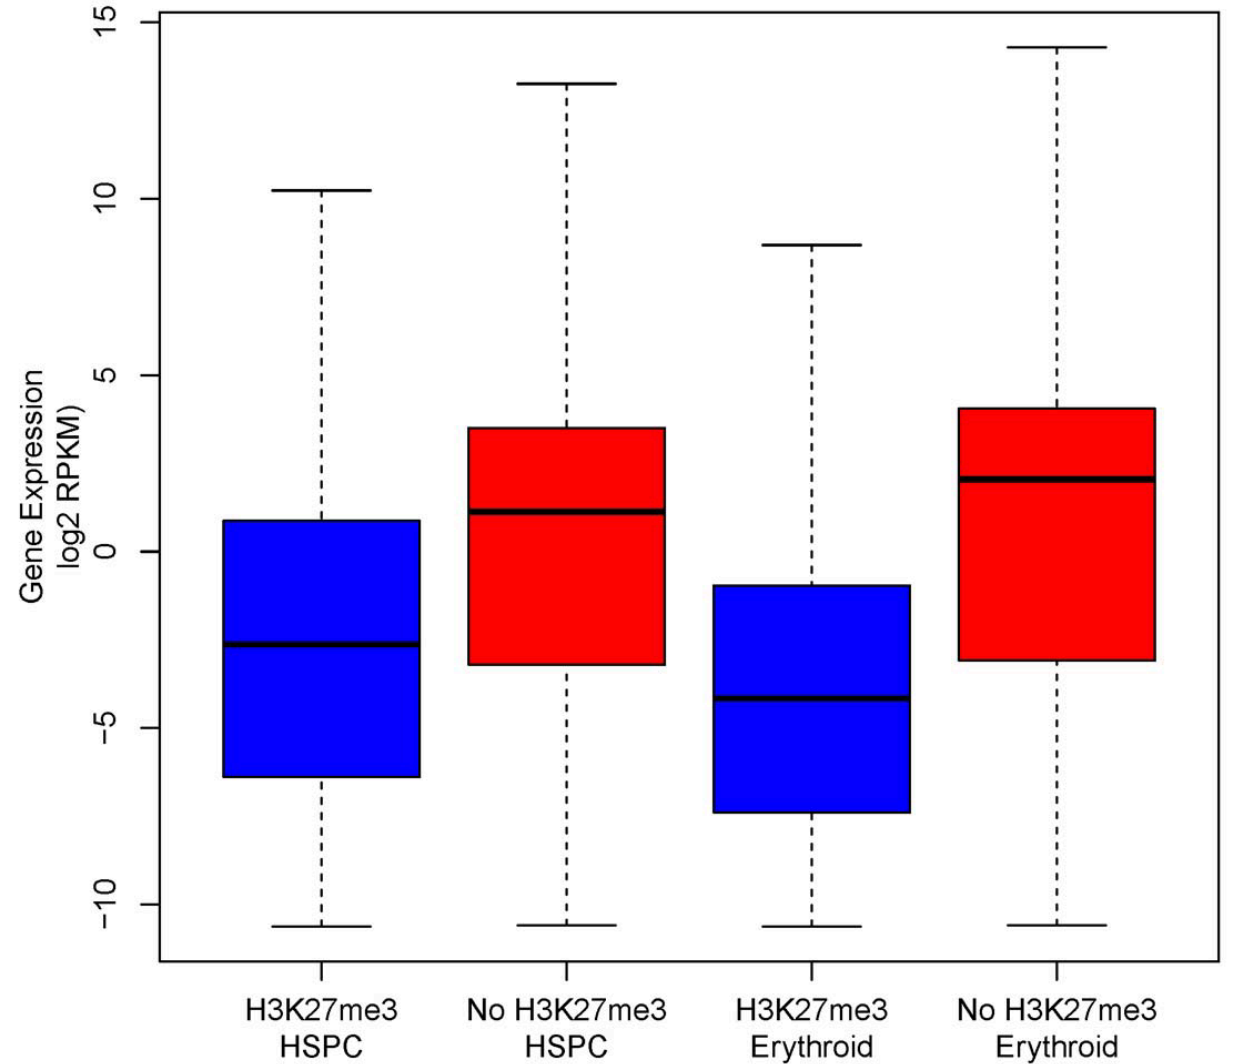

Supplement: pone.0155378.s001.pdf [file pone.0155378.s001.pdf]
